# Supplementary material for: Maturation of the Human Papillomavirus 16 Capsid
Source: PubMed Central journal article supplement — mBio. 2014 Aug 5;5(4):e01104-14. doi: 10.1128/mBio.01104-14 (PMC4128349; doi:10.1128/mbio.01104-14), 2014-08-05
Supplement: mbo004141927st1.pdf [file mbo004141927st1.pdf]

**Table S1**

|                             | a    | b   | c   | d   | e    | Total<br>Images | Classified<br>Images |
|-----------------------------|------|-----|-----|-----|------|-----------------|----------------------|
| Size (Å) <sup>1</sup>       | 600  | 607 | 612 | 619 | 633  |                 |                      |
| 18-hour (%)                 | 25   | 5   | 11  | 25  | 34   | 7822            | 2929                 |
| 4-hour (%)                  | 59   | 16  | 8   | 4   | 12   | 2354            | 1037                 |
| 1-hour (%)                  | 30   | 24  | 17  | 10  | 10   | 2801            | 1110                 |
| Total                       | 1675 | 591 | 588 | 982 | 1252 |                 |                      |
| Resolution (Å)<br>(FSC=0.5) | 21   | 21  | 24  | 26  | 29   |                 |                      |
| Resolution (Å)<br>(FSC=0.3) | 20   | 21  | 24  | 24  | 25   |                 |                      |

**Table S1**

Table 1 describes how the three preparations, which differ in maturation time, were distributed amongst the 5 classes in the maturation series. Letters a-e represent the classes as shown in Figure 3, with a as the mature class and e as the least mature class. For the 5 reconstructions a-e the normalized size and estimated resolution are shown for each class. The percentages refer to the fraction of classified capsid images used for the reconstruction.

---

<sup>1</sup> The size of each virion was determined by the zero-crossing of a 1-D radial average from the 3D density map.
