# Supplementary material for: Maturation of the Human Papillomavirus 16 Capsid
Source: PubMed Central journal article supplement — mBio. 2014 Aug 5;5(4):e01104-14. doi: 10.1128/mBio.01104-14 (PMC4128349; doi:10.1128/mbio.01104-14), 2014-08-05
Supplement: mbo004141927st2.pdf [file mbo004141927st2.pdf]

**Table S2**

|                             | Total Images | Classified Images | a   | b   |
|-----------------------------|--------------|-------------------|-----|-----|
| C175S (1-hour)              | 1906         | 1424              | 39% | 55% |
| Size (Å)                    |              |                   | 650 | 656 |
| Resolution (FSC=0.5)(Å)     |              |                   | 37  | 33  |
| Resolution (FSC=0.3)<br>(Å) |              |                   | 34  | 29  |

**Table S2**

Table S2 describes the statistics for the C175S mutant, which cannot form stabilizing disulfide crosslinks. (a) started with a mature model (Table S1 column a or Figure 3 panel a). (b) started with the least mature model (Table S1 column e or Figure 3 panel e). The percentages refer to the fraction of classified capsid images used for the reconstruction.
